# Supplementary material for: Bayesian deconstruction of climate sensitivity estimates using simple models: implicit priors and the confusion of the inverse
Source: Copernicus journal article supplement (doi:10.5194/esd-11-347-2020), 2020-04-21
Supplement: Supplementary file 1 [file esd-11-347-2020-supplement.zip]

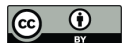

## *Supplement of*

# **Bayesian deconstruction of climate sensitivity estimates using simple models: implicit priors and the confusion of the inverse**

**James D. Annan and Julia C. Hargreaves**

*Correspondence to:* James D. Annan ([jdannan@blueskiesresearch.org.uk](mailto:jdannan@blueskiesresearch.org.uk))

- [esd-11-347-2020-supplement-title-page.pdf](#)
- [code](#)
  - [fig1.R](#)
  - [fig2.R](#)
  - [fig3.R](#)
  - [fig4.R](#)
  - [fig5.R](#)

The copyright of individual parts of the supplement might differ from the CC BY 4.0 License.
